# Supplementary material
Source: PubMed Central journal article supplement (PMC3147802)

## Supplementary Information

The RPB2 flap loop of human RNA polymerase II is dispensable for transcription initiation and elongation.

Murali Palangat,<sup>1</sup> Jeffrey A Grass,<sup>1</sup> Marie-France Langelier,<sup>2,‡</sup> Benoit Coulombe<sup>2,3</sup> and Robert Landick<sup>1,4</sup>

Department of Biochemistry, University of Wisconsin-Madison, Madison, WI-53706<sup>1</sup>.  
Institut de Recherches Cliniques de Montréal, 110, Montréal, Que., Canada H2W 1R7<sup>2</sup>;  
Département de Biochimie, Université de Montréal, Montréal, Québec, Canada, H3C 3J7<sup>3</sup>;  
Department of Bacteriology, University of Wisconsin-Madison, Madison, WI-53706<sup>4</sup>.

<sup>‡</sup>Present address: Department of Biochemistry and Molecular Biology, Kimmel Cancer Center, Thomas Jefferson University, Philadelphia, Pennsylvania 19107.

Supplementary Table 1, 2  
Supplementary Figures 1

**Supplementary Table 1.**

| <b>Plasmid</b>         |             |                                                                                                                                        |
|------------------------|-------------|----------------------------------------------------------------------------------------------------------------------------------------|
| <b>Stock #</b>         | <b>Name</b> | <b>Description</b>                                                                                                                     |
| <b>5012</b>            | pJG012      | hRpb2 wild-type expression plasmid. hRpb2 with N-terminal His <sub>10</sub> , PPX, Flag <sub>3x</sub> & HA <sub>3x</sub> epitope tags. |
| <b>5019</b>            | pJG019      | hRpb2 ΔFL expression plasmid. hRpb2 with N-terminal His <sub>10</sub> , PPX, Flag <sub>3x</sub> & HA <sub>3x</sub> epitope tags.       |
| <b>Oligonucleotide</b> |             |                                                                                                                                        |
| <b>Stock #</b>         | <b>Name</b> | <b>Sequence (5'-)</b>                                                                                                                  |
| <b>DNA</b>             |             |                                                                                                                                        |
| <b>6437</b>            | NT DNA      | GGTCAGTACGTCCTAAGCGGCGGGTGAAGAGATTCAGAGCCATC<br>CCAATGGACACC                                                                           |
| <b>6438</b>            | T DNA       | GGTGTCCATTGGGATGGCTCTGAATCTCTTCCACCCGCCGCTTAG<br>GACGTACTGACC                                                                          |
| <b>RNA</b>             |             |                                                                                                                                        |
| <b>6359</b>            | RNA15       | GAGUCUGGCGGCGGG                                                                                                                        |

**Supplementary Table 2.**

| <b>Data set</b>    | <b>Figure</b> | <b>CMARRT<sup>a</sup><br/>regions</b> | <b>CMARRT<br/>regions with a<br/>Promoter near<br/>or within it</b> | <b>CMARRT<br/>regions<br/>with<br/>Promoters<br/>in it</b> | <b>CMARRT<br/>regions<br/>without a<br/>Promoter in<br/>it</b> | <b>CMARRT<br/>regions<br/>without a<br/>Promoter in<br/>it<sup>b</sup></b> | <b>CMARRT<br/>regions not<br/>within an<br/>ENCODE<br/>region</b> | <b>CMARRT<br/>regions<br/>within an<br/>ENCODE<br/>region</b> |
|--------------------|---------------|---------------------------------------|---------------------------------------------------------------------|------------------------------------------------------------|----------------------------------------------------------------|----------------------------------------------------------------------------|-------------------------------------------------------------------|---------------------------------------------------------------|
| WT Rpb2            | 6A            | 20159                                 | 18938                                                               | 10919                                                      | 8019                                                           | 1221                                                                       | 19444                                                             | 715                                                           |
| ΔFL Rpb2           | 6B            | 22216                                 | 20697                                                               | 11771                                                      | 8926                                                           | 1519                                                                       | 21439                                                             | 777                                                           |
| Rpb1               | 6C            | 18357                                 | 17093                                                               | 11386                                                      | 5707                                                           | 1264                                                                       | 17871                                                             | 486                                                           |
| WT/ΔFL             | 6D            | 850                                   | 789                                                                 | 49                                                         | 740                                                            | 61                                                                         | 783                                                               | 67                                                            |
| ΔFL/RPB1           | 6E            | 966                                   | 843                                                                 | 76                                                         | 767                                                            | 123                                                                        | 849                                                               | 117                                                           |
| WT/RPB1            | 6F            | 1988                                  | 1728                                                                | 120                                                        | 1608                                                           | 255                                                                        | 1728                                                              | 255                                                           |
| ΔFL/WT             | -             | 19                                    |                                                                     |                                                            |                                                                |                                                                            |                                                                   |                                                               |
| RPB1/ΔFL           | -             | 0                                     |                                                                     |                                                            |                                                                |                                                                            |                                                                   |                                                               |
| RPB1/WT            | -             | 0                                     |                                                                     |                                                            |                                                                |                                                                            |                                                                   |                                                               |
| WT/WT <sup>c</sup> | -             | 35                                    |                                                                     |                                                            |                                                                |                                                                            |                                                                   |                                                               |

<sup>a</sup> CMARRT: Correlation, Moving, Average, Robust and Rapid method on Tiling array. Extends the standard moving average approach by incorporating correlation structure to identify bound regions (1).

<sup>b</sup> Data not presented, outside of limits shown.

<sup>c</sup> Ratio of WT replicate 1 vs WT average.

1. Kuan, P. F., H. Chun, and S. Keles. 2008. CMARRT: A tool for the analysis of ChIP-Chip data from tiling arrays by incorporating the correlation structure. Pacific Symposium on Biocomputing 13:515-526.

Supplementary Figure 1. Amino acid sequence of the epitope tags.

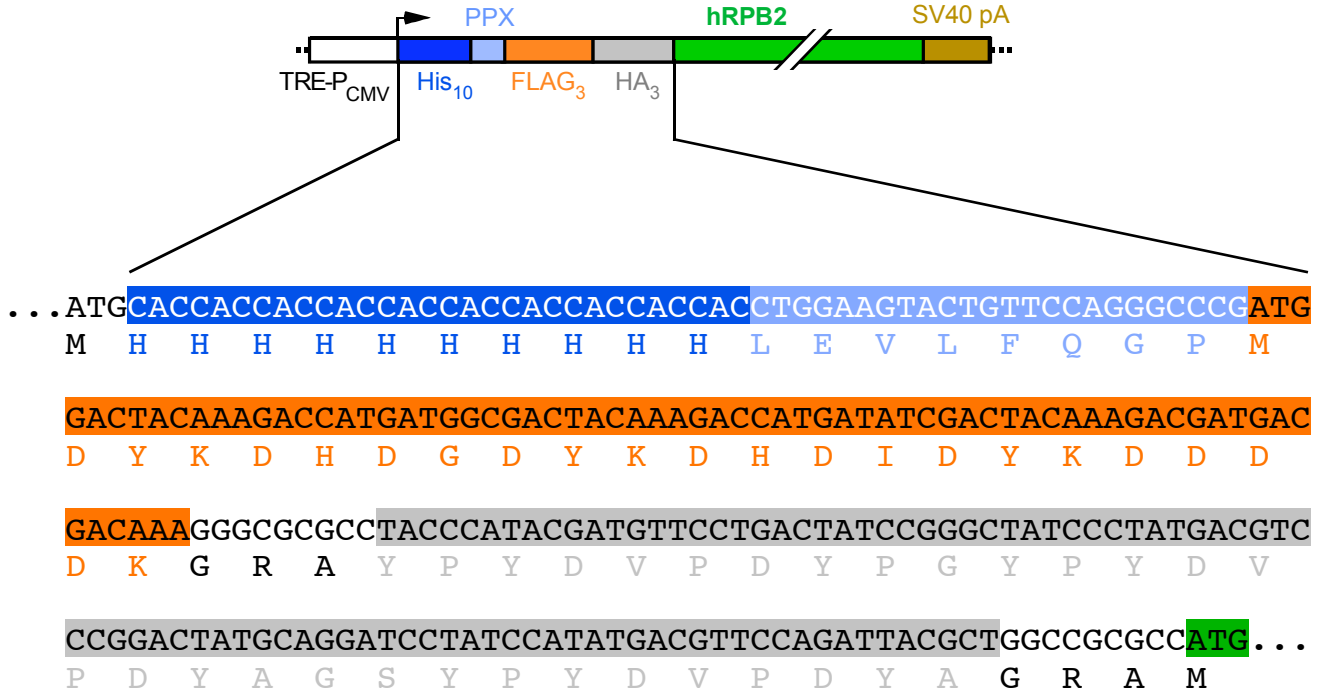

Supplement: supp_31_16_3312__1.pdf [file supp_31_16_3312__1.pdf]
